# Supplementary material for: The PPAR-γ Agonist Pioglitazone Modulates Proliferation and Migration in HUVEC, HAOSMC and Human Arteriovenous Fistula-Derived Cells
Source: MDPI journal article supplement (doi:10.3390/ijms24054424), 2023-02-23
Supplement: s1 [file s1]

## Supplementary File

### Western Blot for PPAR- $\gamma$ detection in HUVEC

Total cellular proteins were extracted from HUVEC using Laemmli Sample Buffer (BioRad Laboratories, CA, USA) with  $\beta$ -mercaptoethanol. Samples were run in gel containing 10% polyacrylamide (Roth A124.2) and transferred to nitrocellulose blotting membrane (Amersham Protran Premium 10600003). Then, membrane was blocked with 5% non-fat dry milk in TBS-Tween for 1 h at room temperature and incubated with the following primary antibodies: rabbit anti-PPAR $\gamma$  (1:1000; C26H12, Cell Signaling Technology, Danvers, MA, USA) and mouse anti-GAPDH (1:5000; mouse anti-GAPDH (1:5000; 60004-1-Ig, Proteintech, Rosemont, IL, USA) for 1 h at room temperature and then washed with TBS-Tween for 30 minutes. Membrane was then incubated for 1h at room temperature with respective secondary antibodies: donkey anti-rabbit IgG antibody conjugated to IRDye 800 CW (1:5000; 926-32213, LI-COR, Lincoln, NE, USA) and donkey anti-mouse IgG antibody conjugated to IRDye 680RD (1:5000; 926-68072, LI-COR, Lincoln, NE, USA) and washed with TBS-Tween for 30 minutes. The protein signal was detected with a LI-COR Odyssey CLX-2088 imaging system.

### Supplementary Figure S1.

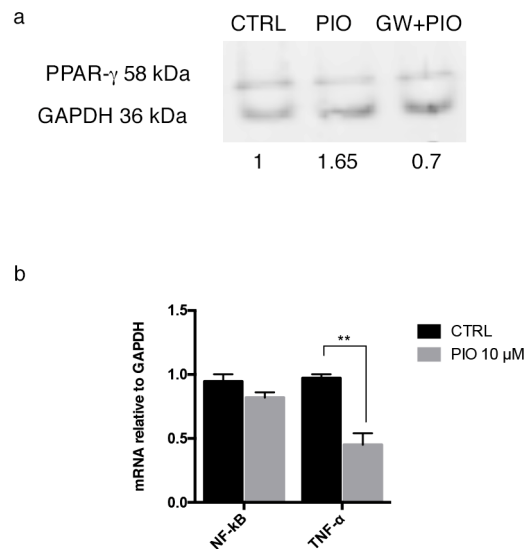

**Figure S1. PPAR- $\gamma$  expression in HUVEC.** (a) Representative Western Blot for PPAR- $\gamma$  detection in HUVEC treated with pioglitazone (10  $\mu$ M) and pioglitazone (10  $\mu$ M)/GW9662 (5  $\mu$ M) combination for 24 h. Protein quantification was performed through densitometric analysis of band intensities by ImageJ and PPAR- $\gamma$ /GAPDH ratio was reported. (b) Transcript levels of PPAR- $\gamma$  target genes NF- $\kappa$ B and TNF- $\alpha$ , upstream regulators of the inflammatory process, by Real Time PCR. Statistical analysis was performed by paired Student's t test relative to untreated controls. \*\*,  $p < 0.01$ . Abbreviations: HUVEC, human umbilical vein endothelial cells; CTRL, control; GAPDH, glyceraldehyde 3-phosphate dehydrogenase; NF- $\kappa$ B, nuclear factor kappa-light-chain-enhancer of activated B cells; TNF- $\alpha$ , tumor necrosis factor  $\alpha$ ; PIO, pioglitazone; PPAR- $\gamma$ , peroxisome-proliferator-associated-receptor- $\gamma$ .

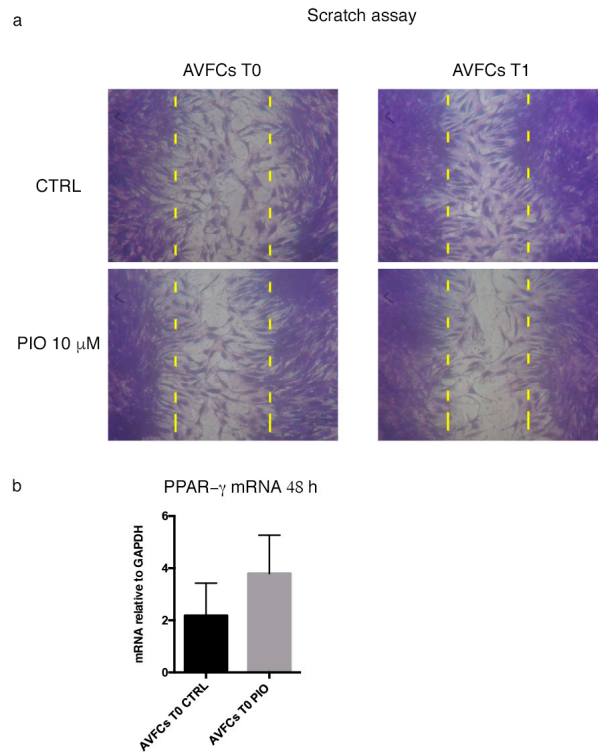

**Figure S2: Effects of pioglitazone in AVFCs migration and PPAR- $\gamma$  expression.**

(a) Representative images at 10 x magnification of cell migration performed by manual scratch assay in AVFCs T0 and AVFCs T1 exposed to pioglitazone (10  $\mu$ M) for 48 h, and stained with crystal violet. (b) PPAR- $\gamma$  mRNA expression evaluated by Real Time PCR in AVFCs T0 exposed to pioglitazone (10  $\mu$ M) for 48 h. Results are expressed as fold changes relative to untreated controls and reported as mean  $\pm$  SEM of at least three independent experiments (n=3). Abbreviations: AVFCs, arteriovenous fistula cells; CTRL, control; GAPDH, glyceraldehyde 3-phosphate dehydrogenase; n, number of values; PIO, pioglitazone.
